# Supplementary material for: О рефлексивности законов экономической теории
Source: MDPI journal article supplement (doi:10.3390/molecules29040784), 2011-11-07
Supplement: s1 [file s1]

# Substitution Effect of a Single Nitrogen Atom on $\pi$ -Electronic Systems of Linear Polycyclic Aromatic Hydrocarbons (PAHs); Theoretically Visualized Coexistence of Mono- and Poly-cyclic $\pi$ -Electron Delocalization

Jong Min Lim <sup>1,†</sup>, Sangdeok Shim <sup>2,†</sup>, Hoa Thi Bui <sup>3</sup>, Jimin Kim <sup>3</sup>, Ho-Joong Kim <sup>4</sup>, Yoon Hwa <sup>5,\*</sup> and Sung Cho <sup>3,\*</sup>

<sup>1</sup> Department of Chemistry, Kyungpook National University, Daegu 41566, Republic of Korea

<sup>2</sup> Department of Chemistry, Suncheon National University, Suncheon 57922, Republic of Korea

<sup>3</sup> Department of Chemistry, Chonnam National University, Gwangju 61186, Republic of Korea

<sup>4</sup> Department of Chemistry, Chosun University, Gwangju 61452, Republic of Korea

<sup>5</sup> School of Electrical, Computer and Energy Engineering, Arizona State University, Tempe, AZ 85287, USA

**Table S1.** Aromaticity indices of the linear tricyclic N-PAHs.

| Compound        | Location            | HOMA          | AICD critical isosurface value | NICS(2)         |
|-----------------|---------------------|---------------|--------------------------------|-----------------|
| Anthracene      | Center C-6MR        | 0.760         | 0.081                          | - 6.69          |
|                 | Side C-6MR          | 0.662         | 0.072                          | - 5.21          |
|                 | C-10MR              | 0.792         | 0.081                          |                 |
|                 | C-14MR              | 0.806         | 0.082                          |                 |
| Phenanthrene    | Center C-6MR        | 0.511         | 0.076                          | - 4.94          |
|                 | Side C-6MR          | 0.891         | 0.077                          | - 5.44          |
|                 | C-10MR              | 0.698         | 0.076                          |                 |
|                 | C-14MR              | 0.779         | 0.081                          |                 |
| Acridine        | Center N-6MR        | 0.765         | 0.074                          | - 6.57          |
|                 | Side C-6MR          | 0.664         | 0.069                          | - 5.19          |
|                 | N-10MR (quinoline)  | 0.797         | 0.074                          |                 |
|                 | N-14MR              | 0.811         | 0.084                          |                 |
| Phenanthridine  | Center N-6MR        | 0.629         | 0.075                          | - 4.89          |
|                 | C-6MR (C-6MR')      | 0.902 (0.912) | 0.072 (0.079)                  | - 5.38 (- 5.48) |
|                 | N-10MR (N-10MR)'    | 0.769 (0.762) | 0.075 (0.075)                  |                 |
|                 | N-14MR              | 0.824         | 0.075                          |                 |
| Carbazole       | Center N-5MR        | 0.657         | 0.061                          | - 4.31          |
|                 | Side C-6MR          | 0.958         | 0.069                          | - 5.26          |
|                 | N-9MR (indole)      | 0.826         | 0.061                          |                 |
|                 | N-13MR              | 0.891         | 0.078                          |                 |
| Isocarbazole    | Center N-5MR        | 0.725         | 0.071                          | - 5.95          |
|                 | Side C-6MR          | 0.801         | 0.072                          | - 5.25          |
|                 | Side N-6MR          | 0.803         | 0.074                          | - 4.21          |
|                 | N-9MR (isoindole)   | 0.842         | 0.076                          |                 |
|                 | N-9MR' (indolizine) | 0.839         | 0.071                          |                 |
|                 | N-13MR              | 0.885         | 0.074                          |                 |
| Pseudocarbazole | Center N-5MR        | 0.714         | 0.061                          | - 5.37          |
|                 | Side C-6MR          | 0.917         | 0.071                          | - 5.62          |
|                 | Side N-6MR          | 0.686         | 0.073                          | - 3.31          |
|                 | N-9MR (indole)      | 0.845         | 0.078                          |                 |
|                 | N-9MR (indolizine)  | 0.772         | 0.061                          |                 |
|                 | N-13MR              | 0.845         | 0.073                          |                 |

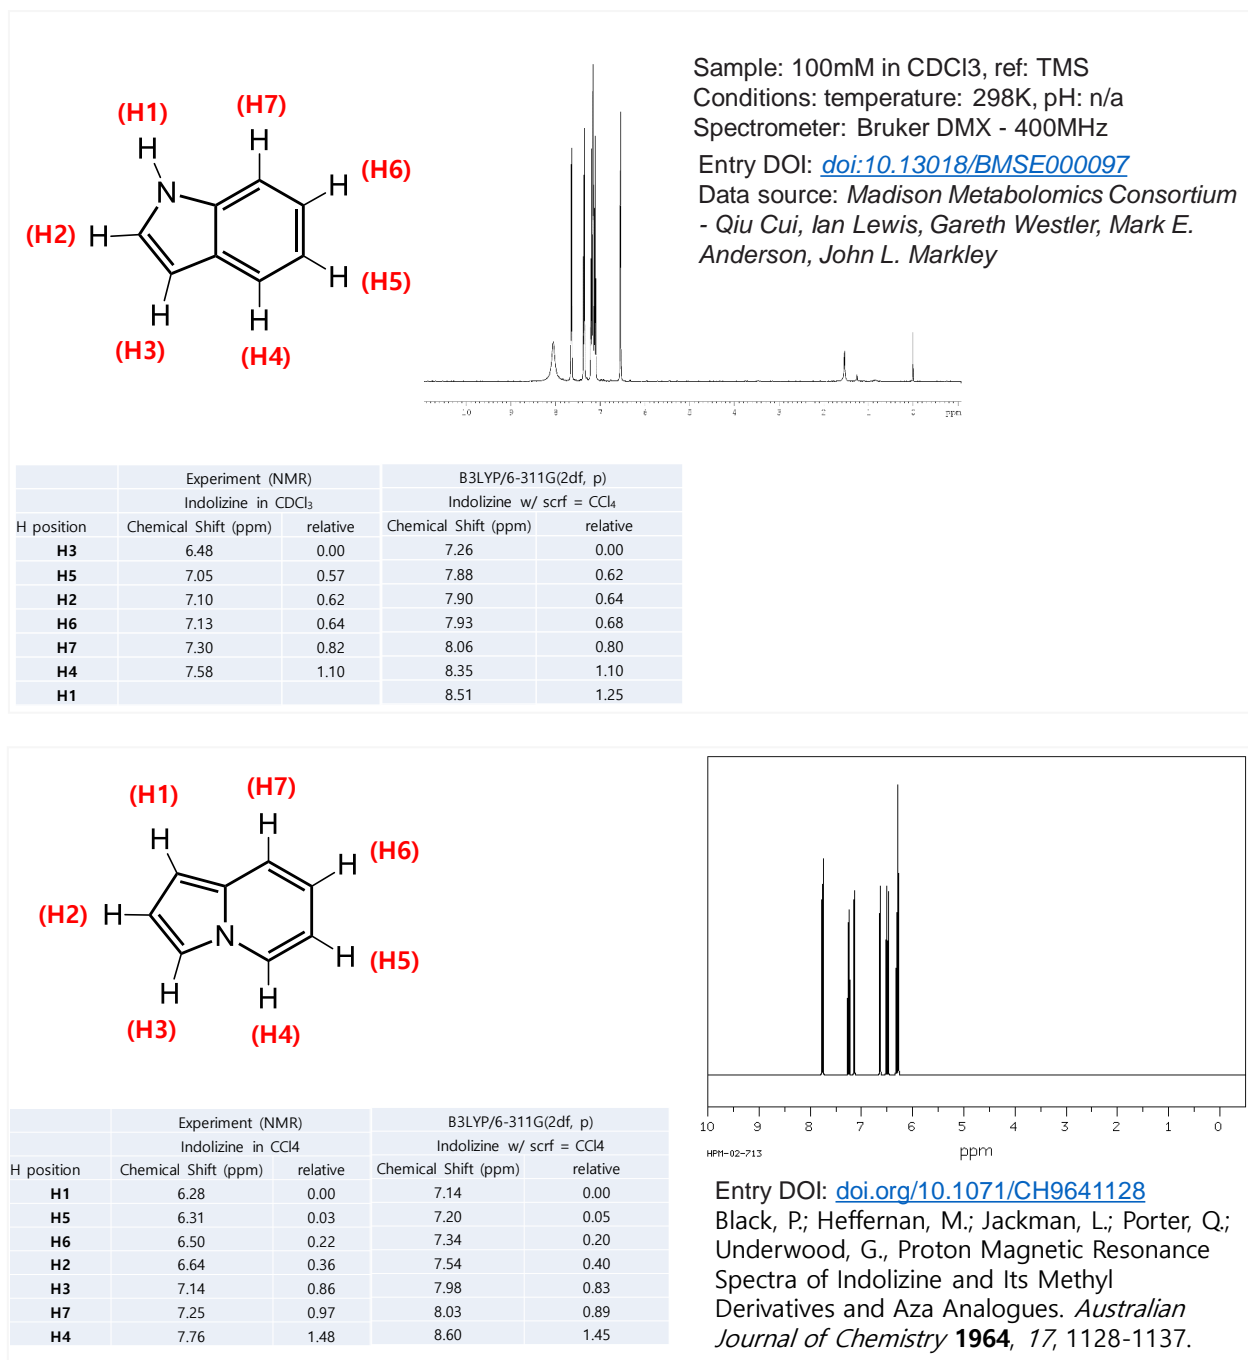

**Figure S1.** H-NMR comparisons between experimental and theoretical (GIAO-B3LYP/6-311G(2df,p)) results of indole and indolizine.

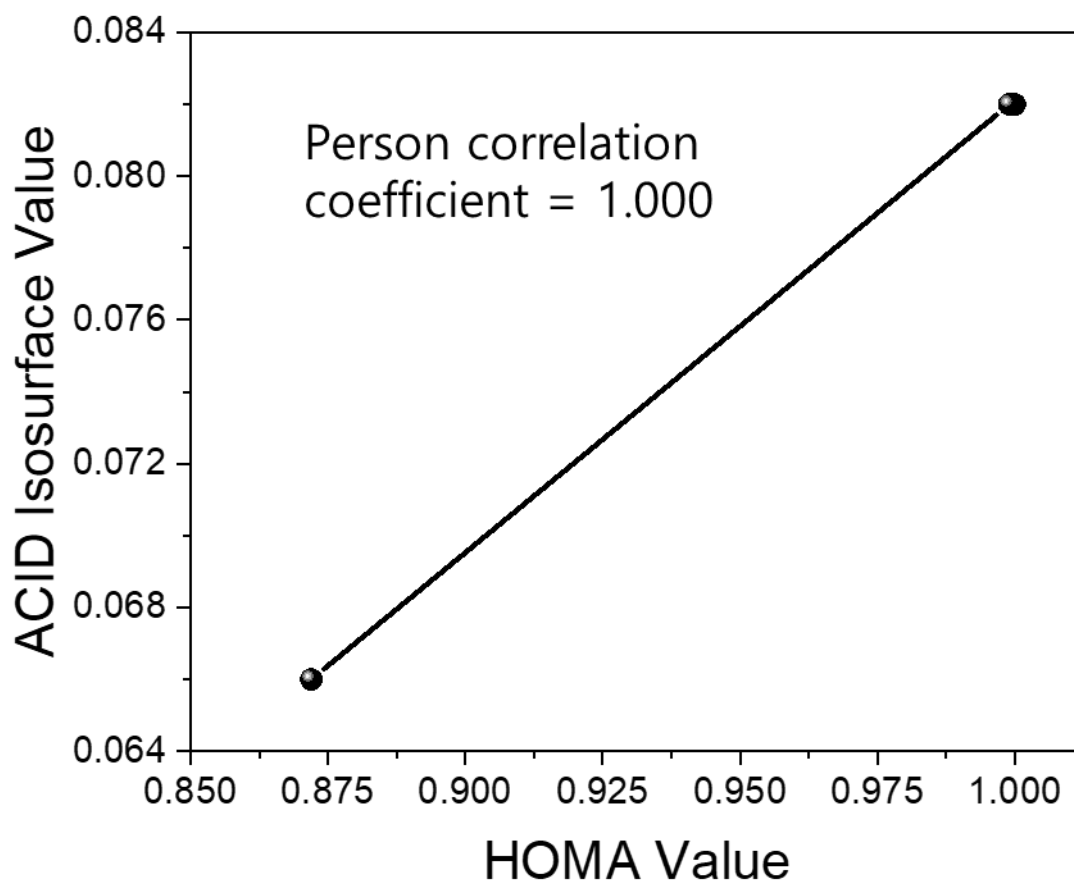

**Figure S2.** Correlation between HOMA and ACID values of monocycles.

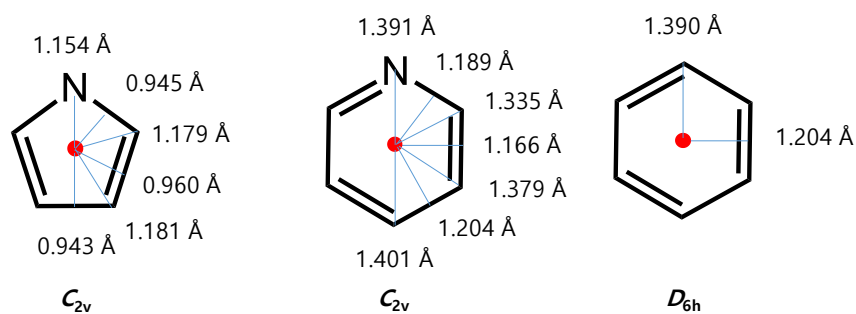

|                      | Averaged Distance (reduced distance compared to those of benzene) |                    |         |
|----------------------|-------------------------------------------------------------------|--------------------|---------|
| <b>center – atom</b> | 1.175 Å (- 15.5 %)                                                | 1.370 Å (- 1.44 %) | 1.390 Å |
| <b>center – bond</b> | 0.949 Å (- 21.2 %)                                                | 1.186 Å (- 1.47 %) | 1.204 Å |

**Figure S3.** Averaged distance from atoms and covalent bonds to the center (NICS probe).

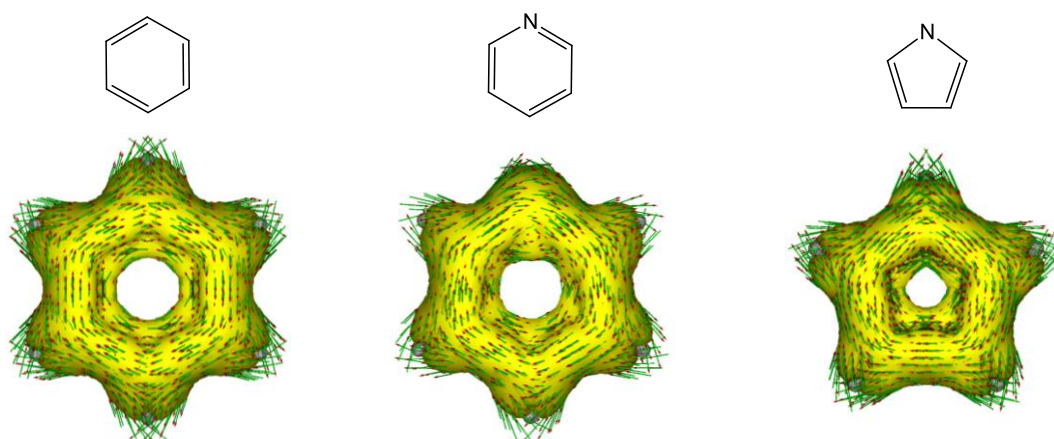

**Figure S4.** Magnetic induced current maps of six- and five-membered monocycles; benzene, pyridine, and pyrrole.

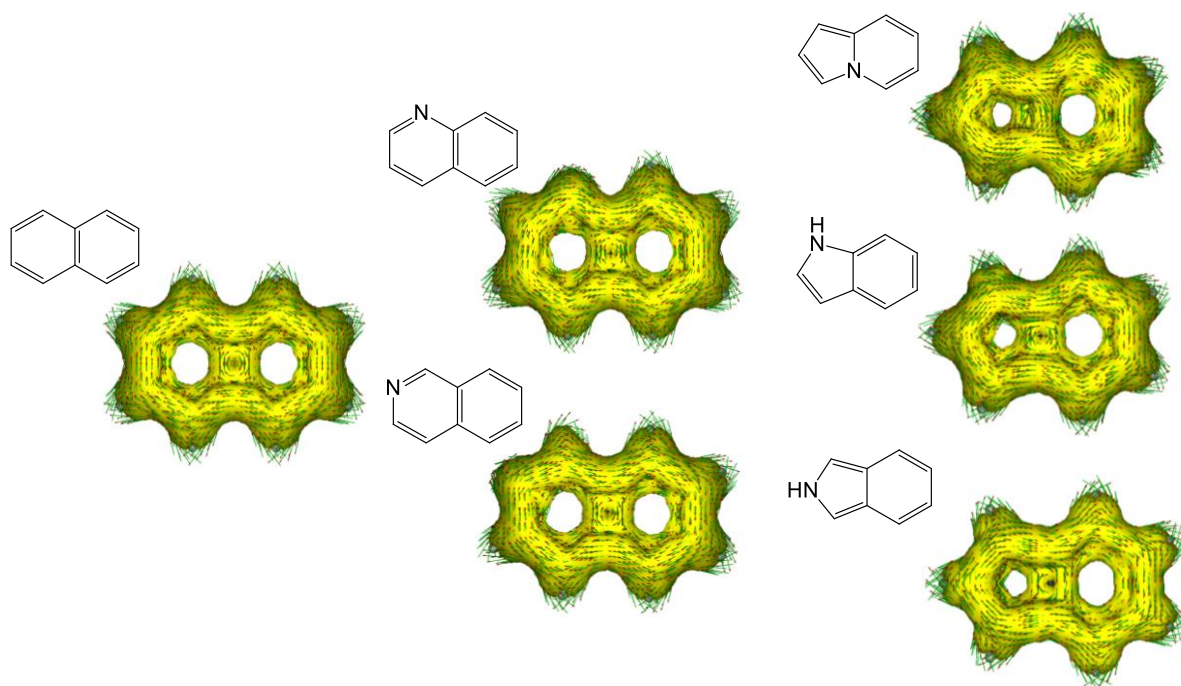

**Figure S5.** Magnetic induced current maps of fused bicycles with constituent six- and five-membered rings.

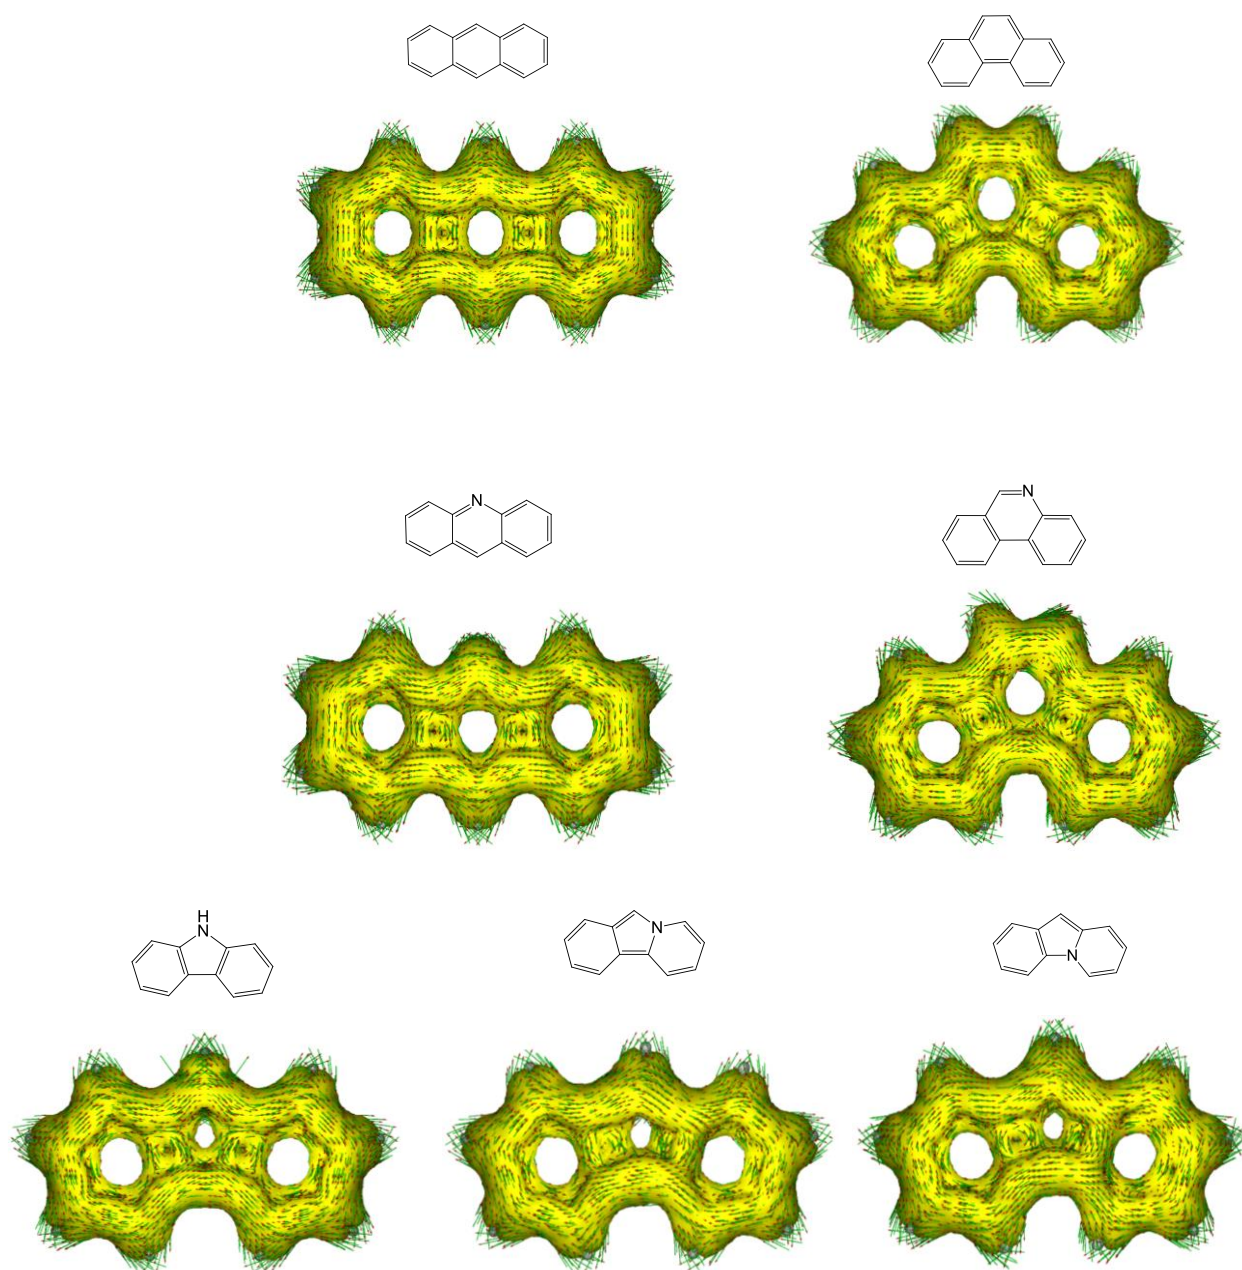

**Figure S6.** Magnetic induced current maps of fused tricycles with constituent six- and five-membered rings.

|                                                                                     |       |                                                                                      |       |                                                                                       |       |
|-------------------------------------------------------------------------------------|-------|--------------------------------------------------------------------------------------|-------|---------------------------------------------------------------------------------------|-------|
| 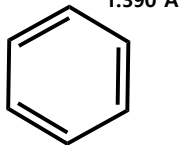 |       |  |       |  |       |
| E                                                                                   | 0.001 | E                                                                                    | 0.000 | E                                                                                     | 0.022 |
| G                                                                                   | 0.000 | G                                                                                    | 0.000 | G                                                                                     | 0.107 |
| H                                                                                   | 0.999 | H                                                                                    | 1.000 | H                                                                                     | 0.872 |

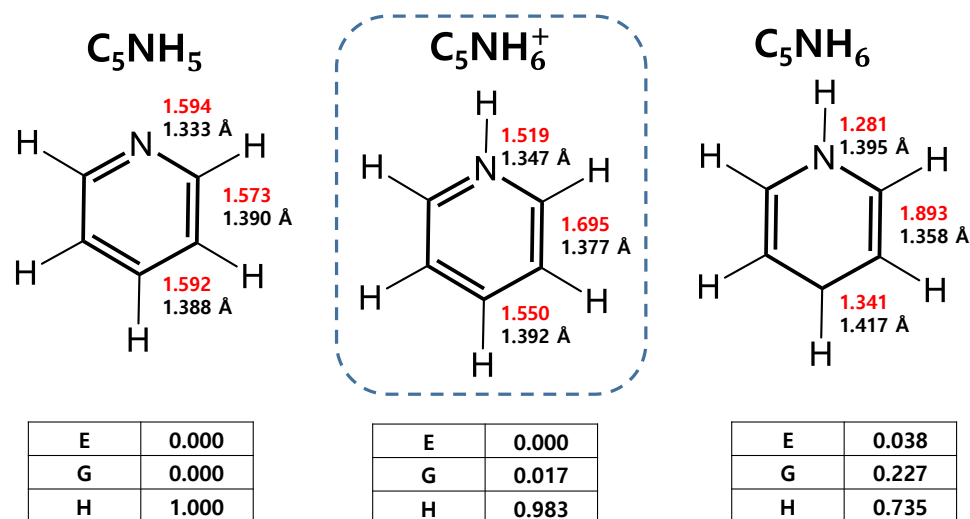

**Figure S7.** Bond lengths (black), Pauling bond numbers (red), and HOMA parameters of monocycles and N-6MRs with different charge states.

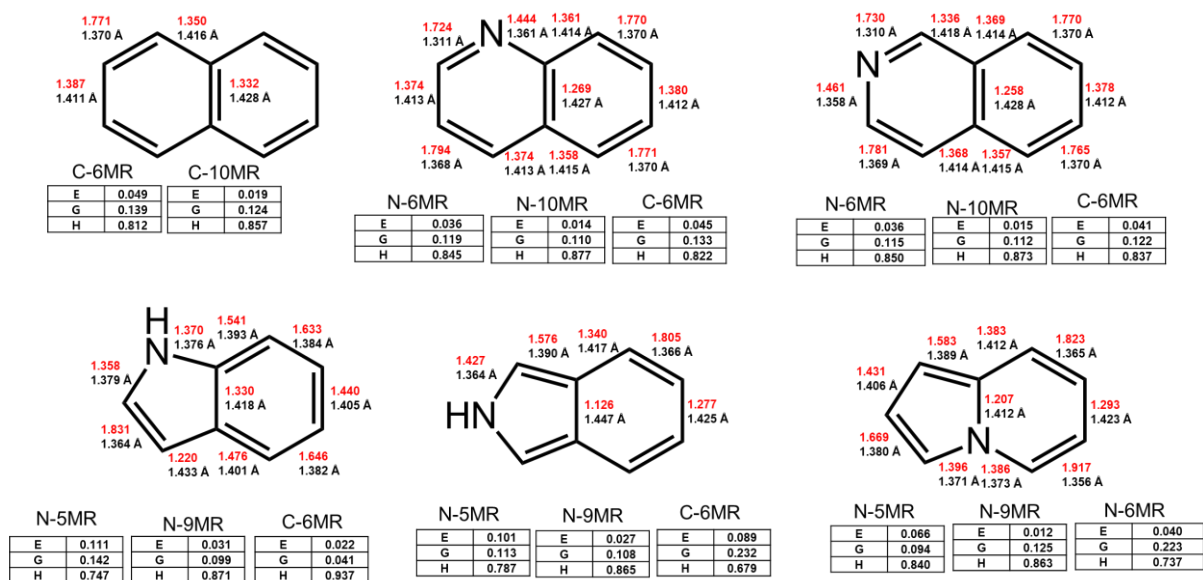

**Figure S8.** Bond lengths (black), Pauling bond numbers (red), and HOMA parameters of bicycles.

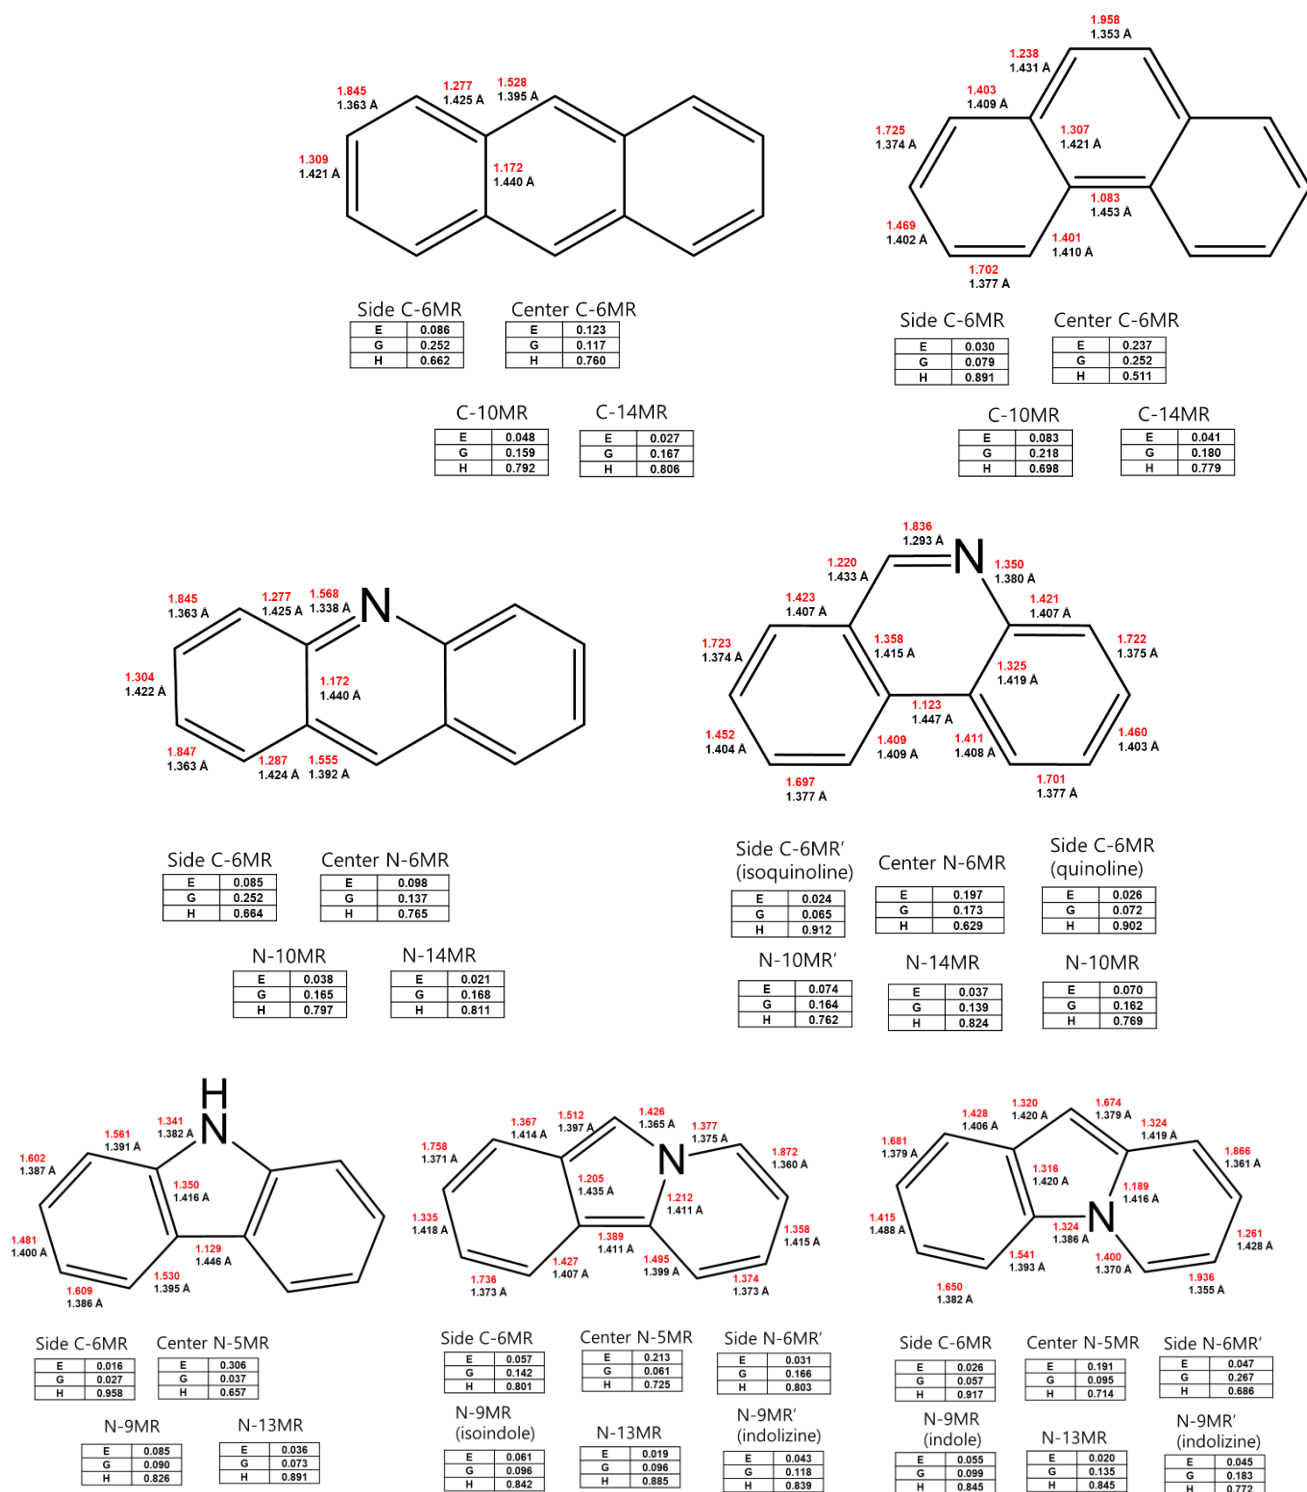

**Figure S9.** Bond lengths (black), Pauling bond numbers (red), and HOMA parameters of tricycles.

Optimized molecular structures (B3LYP/6-311G(2df,p))

1. Benzene

|   |             |             |            |
|---|-------------|-------------|------------|
| C | 0.00000000  | 1.39029300  | 0.00000000 |
| C | 1.20402900  | 0.69514700  | 0.00000000 |
| C | 1.20402900  | -0.69514700 | 0.00000000 |
| C | 0.00000000  | -1.39029300 | 0.00000000 |
| C | -1.20402900 | -0.69514700 | 0.00000000 |
| C | -1.20402900 | 0.69514700  | 0.00000000 |
| H | 0.00000000  | 2.47396700  | 0.00000000 |
| H | 2.14251800  | 1.23698300  | 0.00000000 |
| H | 2.14251800  | -1.23698300 | 0.00000000 |
| H | 0.00000000  | -2.47396700 | 0.00000000 |
| H | -2.14251800 | -1.23698300 | 0.00000000 |
| H | -2.14251800 | 1.23698300  | 0.00000000 |

2. Pyridine

|   |             |             |            |
|---|-------------|-------------|------------|
| C | 0.00000000  | 1.34663400  | 0.00000000 |
| C | 1.20338100  | 0.65109200  | 0.00000000 |
| C | 1.16549400  | -0.73623900 | 0.00000000 |
| C | -0.07105600 | -1.36633200 | 0.00000000 |
| C | -1.21608600 | -0.57845000 | 0.00000000 |
| N | -1.19443900 | 0.75449800  | 0.00000000 |
| H | 2.08157400  | -1.31498200 | 0.00000000 |
| H | -0.00486700 | 2.43267300  | 0.00000000 |
| H | 2.14424000  | 1.18748900  | 0.00000000 |
| H | -0.15134500 | -2.44637300 | 0.00000000 |
| H | -2.19893400 | -1.04053100 | 0.00000000 |

3. Pyrrole

|   |            |             |             |
|---|------------|-------------|-------------|
| C | 0.00000000 | 1.12107100  | 0.33031700  |
| C | 0.00000000 | 0.71022800  | -0.97944800 |
| C | 0.00000000 | -0.71022800 | -0.97944800 |
| C | 0.00000000 | -1.12107100 | 0.33031700  |
| N | 0.00000000 | 0.00000000  | 1.11812300  |
| H | 0.00000000 | 0.00000000  | 2.12293700  |
| H | 0.00000000 | 2.10771300  | 0.76213100  |
| H | 0.00000000 | 1.35651300  | -1.84224400 |
| H | 0.00000000 | -1.35651300 | -1.84224400 |
| H | 0.00000000 | -2.10771300 | 0.76213100  |

4. Naphthalene



|   |            |             |             |
|---|------------|-------------|-------------|
| C | 0.00000000 | 2.42309100  | 0.70569000  |
| C | 0.00000000 | 1.24048000  | 1.39682000  |
| C | 0.00000000 | 0.00000000  | 0.71401900  |
| C | 0.00000000 | 0.00000000  | -0.71401900 |
| C | 0.00000000 | 1.24048000  | -1.39682000 |
| C | 0.00000000 | 2.42309100  | -0.70569000 |
| H | 0.00000000 | -1.23905900 | 2.48130900  |
| H | 0.00000000 | 3.36521800  | 1.24076600  |
| H | 0.00000000 | 1.23905900  | 2.48130900  |
| C | 0.00000000 | -1.24048000 | 1.39682000  |
| C | 0.00000000 | -1.24048000 | -1.39682000 |
| H | 0.00000000 | 1.23905900  | -2.48130900 |
| H | 0.00000000 | 3.36521800  | -1.24076600 |
| C | 0.00000000 | -2.42309100 | -0.70569000 |
| C | 0.00000000 | -2.42309100 | 0.70569000  |
| H | 0.00000000 | -1.23905900 | -2.48130900 |
| H | 0.00000000 | -3.36521800 | -1.24076600 |
| H | 0.00000000 | -3.36521800 | 1.24076600  |

#### 5. Quinoline

|   |             |             |             |
|---|-------------|-------------|-------------|
| C | 2.38831100  | -0.71426200 | 0.00000200  |
| C | 1.20213300  | -1.39944600 | 0.00000100  |
| C | -0.02855900 | -0.70218100 | 0.00000000  |
| C | -0.01403400 | 0.72426400  | 0.00000000  |
| C | 1.22800700  | 1.40189400  | 0.00000100  |
| C | 2.40290600  | 0.69781100  | 0.00000200  |
| H | 3.32658300  | -1.25610300 | 0.00000300  |
| H | 1.16626700  | -2.48144800 | 0.00000200  |
| C | -1.26135500 | 1.38791800  | -0.00000100 |
| H | 1.23447600  | 2.48648100  | 0.00000100  |
| H | 3.35067400  | 1.22252800  | 0.00000200  |
| C | -2.41317500 | 0.65072500  | -0.00000100 |
| C | -2.31748300 | -0.75897500 | -0.00000300 |
| H | -1.28927100 | 2.47223900  | -0.00000100 |
| H | -3.38696100 | 1.12432400  | 0.00000000  |
| H | -3.22570400 | -1.35656500 | 0.00000000  |
| N | -1.18522400 | -1.41970600 | -0.00000100 |

#### 6. Isoquinoline

|   |             |             |            |
|---|-------------|-------------|------------|
| C | -2.41813700 | -0.58713700 | 0.00000000 |
| C | -1.28463600 | -1.35443100 | 0.00000000 |
| C | -0.01877300 | -0.72519700 | 0.00000000 |
| C | 0.00000000  | 0.69706000  | 0.00000000 |

|   |             |             |            |
|---|-------------|-------------|------------|
| C | -1.24760100 | 1.37033300  | 0.00000000 |
| H | 1.20252500  | -2.50818700 | 0.00000000 |
| H | -3.39912600 | -1.05012800 | 0.00000000 |
| H | -1.35328900 | -2.43622600 | 0.00000000 |
| C | 1.21157000  | -1.42415800 | 0.00000000 |
| C | 1.23833200  | 1.37864800  | 0.00000000 |
| H | -1.25571600 | 2.45874700  | 0.00000000 |
| C | 2.41379700  | 0.67523400  | 0.00000000 |
| C | 2.39721900  | -0.73710900 | 0.00000000 |
| H | 1.24241500  | 2.46300200  | 0.00000000 |
| H | 3.36255400  | 1.19787600  | 0.00000000 |
| H | 3.33556100  | -1.27894100 | 0.00000000 |
| N | -2.41222200 | 0.77062700  | 0.00000000 |

#### 7. Indole

|   |             |             |             |
|---|-------------|-------------|-------------|
| C | -0.24816200 | 0.74847600  | 0.00000800  |
| C | -0.24691500 | -0.67015000 | -0.00004600 |
| C | 0.93216100  | -1.41277000 | 0.00004800  |
| C | 2.12725900  | -0.71564300 | 0.00019400  |
| C | 2.15048800  | 0.68906800  | 0.00024800  |
| C | 0.97942000  | 1.42327600  | 0.00015400  |
| C | -1.62011900 | 1.16257700  | -0.00004900 |
| C | -2.38131900 | 0.03077600  | -0.00032300 |
| H | 0.91688000  | -2.49668100 | 0.00000200  |
| H | 3.06240200  | -1.26255300 | 0.00027200  |
| H | 3.10522000  | 1.20111100  | 0.00037600  |
| H | 1.00910900  | 2.50684600  | 0.00022000  |
| H | -1.99288800 | 2.17403100  | 0.00001500  |
| H | -3.45326000 | -0.08301600 | -0.00049600 |
| H | -1.87593800 | -2.03152900 | -0.00029500 |
| N | -1.56120000 | -1.07740900 | -0.00021500 |

#### 8. Isoindole

|   |             |             |             |
|---|-------------|-------------|-------------|
| C | 0.24975800  | -0.72342300 | 0.00002000  |
| C | 0.24975800  | 0.72342300  | -0.00005100 |
| C | -0.98140900 | 1.42544500  | 0.00003300  |
| C | -2.14718100 | 0.71267800  | 0.00018100  |
| C | -2.14718100 | -0.71267800 | 0.00024800  |
| C | -0.98140900 | -1.42544500 | 0.00016800  |
| C | 1.57818400  | -1.13075800 | -0.00004900 |
| C | 1.57818400  | 1.13075800  | -0.00018600 |
| H | -0.99433900 | 2.50950100  | -0.00001000 |
| H | -3.09699400 | 1.23441000  | 0.00025800  |

|   |             |             |             |
|---|-------------|-------------|-------------|
| H | -3.09699400 | -1.23440900 | 0.00037800  |
| H | -0.99433800 | -2.50950100 | 0.00023700  |
| H | 2.02421400  | -2.11046300 | -0.00001400 |
| H | 3.34843800  | 0.00000000  | -0.00050300 |
| H | 2.02421500  | 2.11046300  | -0.00026800 |
| N | 2.34193800  | 0.00000000  | -0.00032400 |

#### 9. Indolizine

|   |             |             |             |
|---|-------------|-------------|-------------|
| C | 0.27902100  | 0.74972500  | -0.00005600 |
| C | -0.96914100 | 1.40972900  | 0.00001700  |
| C | -2.13062000 | 0.69311000  | 0.00015300  |
| C | -2.08629900 | -0.72937300 | 0.00022700  |
| C | -0.89469100 | -1.37699000 | 0.00016500  |
| C | 1.57390700  | -1.10785100 | -0.00002300 |
| C | 2.40225100  | -0.00433300 | -0.00039200 |
| C | 1.60723700  | 1.15523800  | -0.00013000 |
| H | -0.97692100 | 2.49239600  | -0.00001600 |
| H | -3.08736900 | 1.19875200  | 0.00022700  |
| H | -2.99856600 | -1.30988600 | 0.00035600  |
| H | -0.79472000 | -2.45345200 | 0.00023800  |
| H | 1.79676200  | -2.16135400 | 0.00005800  |
| H | 3.48023600  | -0.04208800 | -0.00062300 |
| H | 1.94707100  | 2.17788900  | -0.00015900 |
| N | 0.27764600  | -0.66254200 | 0.00002200  |

#### 10. Anthracene

|   |            |             |             |
|---|------------|-------------|-------------|
| C | 0.00000000 | 3.64559900  | 0.71056700  |
| C | 0.00000000 | 2.47083400  | 1.40133700  |
| C | 0.00000000 | 1.21884400  | 0.71996700  |
| C | 0.00000000 | 1.21884400  | -0.71996700 |
| C | 0.00000000 | 2.47083400  | -1.40133700 |
| C | 0.00000000 | 3.64559900  | -0.71056700 |
| C | 0.00000000 | 0.00000000  | 1.39819100  |
| C | 0.00000000 | 0.00000000  | -1.39819100 |
| C | 0.00000000 | -1.21884400 | -0.71996700 |
| C | 0.00000000 | -1.21884400 | 0.71996700  |
| C | 0.00000000 | -2.47083400 | 1.40133700  |
| H | 0.00000000 | -2.47008600 | 2.48570900  |
| C | 0.00000000 | -3.64559900 | 0.71056700  |
| C | 0.00000000 | -3.64559900 | -0.71056700 |
| C | 0.00000000 | -2.47083400 | -1.40133700 |
| H | 0.00000000 | 0.00000000  | 2.48346900  |
| H | 0.00000000 | 4.58968600  | 1.24211600  |

|   |            |             |             |
|---|------------|-------------|-------------|
| H | 0.00000000 | 2.47008600  | 2.48570900  |
| H | 0.00000000 | 2.47008600  | -2.48570900 |
| H | 0.00000000 | 4.58968600  | -1.24211600 |
| H | 0.00000000 | 0.00000000  | -2.48346900 |
| H | 0.00000000 | -4.58968600 | 1.24211600  |
| H | 0.00000000 | -4.58968600 | -1.24211600 |
| H | 0.00000000 | -2.47008600 | -2.48570900 |

#### 11. Phenanthrene

|   |            |             |             |
|---|------------|-------------|-------------|
| C | 0.00000000 | 3.54759100  | -0.29495400 |
| C | 0.00000000 | 2.82699400  | 0.87505700  |
| C | 0.00000000 | 1.41772600  | 0.86247000  |
| C | 0.00000000 | 0.72671700  | -0.37958200 |
| C | 0.00000000 | 1.49587600  | -1.56077800 |
| C | 0.00000000 | 2.87194100  | -1.52291900 |
| C | 0.00000000 | 0.67631100  | 2.08597900  |
| C | 0.00000000 | -0.72671700 | -0.37958200 |
| C | 0.00000000 | -1.41772600 | 0.86247000  |
| C | 0.00000000 | -0.67631100 | 2.08597900  |
| C | 0.00000000 | -2.82699400 | 0.87505700  |
| H | 0.00000000 | -3.33721400 | 1.83195700  |
| C | 0.00000000 | -3.54759100 | -0.29495400 |
| C | 0.00000000 | -2.87194100 | -1.52291900 |
| C | 0.00000000 | -1.49587600 | -1.56077800 |
| H | 0.00000000 | 1.22683700  | 3.02014900  |
| H | 0.00000000 | 4.63062600  | -0.27086200 |
| H | 0.00000000 | 3.33721400  | 1.83195700  |
| H | 0.00000000 | 1.00466900  | -2.52422700 |
| H | 0.00000000 | 3.43485200  | -2.44866000 |
| H | 0.00000000 | -1.22683700 | 3.02014900  |
| H | 0.00000000 | -4.63062600 | -0.27086200 |
| H | 0.00000000 | -3.43485200 | -2.44866000 |
| H | 0.00000000 | -1.00466900 | -2.52422700 |

#### 12. Acridine

|   |            |             |             |
|---|------------|-------------|-------------|
| C | 0.00000000 | 3.62639200  | -0.65450300 |
| C | 0.00000000 | 2.47796300  | -1.38792000 |
| C | 0.00000000 | 1.20718500  | -0.74528100 |
| C | 0.00000000 | 1.15124600  | 0.69367800  |
| C | 0.00000000 | 2.37763900  | 1.42021500  |
| C | 0.00000000 | 3.57325800  | 0.76626000  |
| C | 0.00000000 | 0.00000000  | -1.43818200 |
| C | 0.00000000 | -1.15124600 | 0.69367800  |

|   |            |             |             |
|---|------------|-------------|-------------|
| C | 0.00000000 | -1.20718500 | -0.74528100 |
| C | 0.00000000 | -2.47796300 | -1.38792000 |
| H | 0.00000000 | -2.51318100 | -2.47183900 |
| C | 0.00000000 | -3.62639200 | -0.65450300 |
| C | 0.00000000 | -3.57325800 | 0.76626000  |
| C | 0.00000000 | -2.37763900 | 1.42021500  |
| H | 0.00000000 | 0.00000000  | -2.52390500 |
| H | 0.00000000 | 4.58957100  | -1.15020000 |
| H | 0.00000000 | 2.51318100  | -2.47183900 |
| H | 0.00000000 | 2.31415400  | 2.50081700  |
| H | 0.00000000 | 4.49903500  | 1.32932800  |
| H | 0.00000000 | -4.58957100 | -1.15020000 |
| H | 0.00000000 | -4.49903500 | 1.32932800  |
| H | 0.00000000 | -2.31415400 | 2.50081700  |
| N | 0.00000000 | 0.00000000  | 1.37534300  |

### 13. Phenanthridine

|   |             |             |             |
|---|-------------|-------------|-------------|
| C | 3.53032600  | -0.24372300 | -0.00000100 |
| C | 2.78556200  | 0.91164900  | 0.00012400  |
| C | 1.37931200  | 0.86058200  | 0.00000700  |
| C | 0.72062700  | -0.39640000 | -0.00010000 |
| C | 1.51083100  | -1.56215400 | -0.00026200 |
| C | 2.88547700  | -1.48932600 | -0.00022700 |
| C | -0.72670400 | -0.40373400 | -0.00003700 |
| C | -1.38575900 | 0.84825300  | -0.00001100 |
| C | -0.58824300 | 2.03908300  | 0.00002200  |
| C | -2.79128200 | 0.91004900  | 0.00004800  |
| H | -3.27310000 | 1.88151500  | 0.00005200  |
| C | -3.53935700 | -0.24295700 | 0.00009900  |
| C | -2.89227700 | -1.48839800 | 0.00012600  |
| C | -1.51774600 | -1.56917100 | 0.00006100  |
| H | 4.61247100  | -0.19514200 | 0.00006800  |
| H | 3.24825900  | 1.89027800  | 0.00024800  |
| H | 1.03644300  | -2.53489200 | -0.00047400 |
| H | 3.47205700  | -2.40013700 | -0.00037400 |
| H | -1.10261000 | 2.99972700  | 0.00011600  |
| H | -4.62130500 | -0.19574800 | 0.00014300  |
| H | -3.48187300 | -2.39746300 | 0.00021900  |
| H | -1.04776400 | -2.54346000 | 0.00013500  |
| N | 0.70468900  | 2.06468600  | 0.00011000  |

### 14. Carbazole

|   |            |            |             |
|---|------------|------------|-------------|
| C | 0.00000000 | 3.03344600 | -1.14825600 |
|---|------------|------------|-------------|

|   |            |             |             |
|---|------------|-------------|-------------|
| C | 0.00000000 | 3.41552500  | 0.19877300  |
| C | 0.00000000 | 2.47262600  | 1.21577400  |
| C | 0.00000000 | 1.12973500  | 0.85248400  |
| C | 0.00000000 | 0.72320300  | -0.50378400 |
| C | 0.00000000 | 1.69408000  | -1.50499200 |
| H | 0.00000000 | 3.79568300  | -1.91755500 |
| H | 0.00000000 | 4.46868300  | 0.45302300  |
| H | 0.00000000 | 2.77500400  | 2.25648700  |
| H | 0.00000000 | 1.40608100  | -2.54981600 |
| C | 0.00000000 | -1.12973500 | 0.85248400  |
| C | 0.00000000 | -2.47262600 | 1.21577400  |
| C | 0.00000000 | -3.41552500 | 0.19877300  |
| C | 0.00000000 | -3.03344600 | -1.14825600 |
| C | 0.00000000 | -1.69408000 | -1.50499200 |
| C | 0.00000000 | -0.72320300 | -0.50378400 |
| H | 0.00000000 | -2.77500400 | 2.25648700  |
| H | 0.00000000 | -4.46868300 | 0.45302300  |
| H | 0.00000000 | -3.79568300 | -1.91755500 |
| H | 0.00000000 | -1.40608100 | -2.54981600 |
| N | 0.00000000 | 0.00000000  | 1.64884800  |
| H | 0.00000000 | 0.00000000  | 2.65379000  |

#### 15. Isocarbazole

|   |             |             |            |
|---|-------------|-------------|------------|
| C | 2.68601100  | -1.79225500 | 0.00000000 |
| C | 1.81059100  | -2.90758700 | 0.00000000 |
| C | 0.44848700  | -2.75161500 | 0.00000000 |
| C | -0.08752700 | -1.44331800 | 0.00000000 |
| C | 0.80132700  | -0.31631700 | 0.00000000 |
| C | 2.19442600  | -0.51024000 | 0.00000000 |
| H | 3.75591000  | -1.96086500 | 0.00000000 |
| H | 2.23443600  | -3.90511400 | 0.00000000 |
| H | -0.20751600 | -3.61429300 | 0.00000000 |
| H | 2.87009200  | 0.33753300  | 0.00000000 |
| C | -2.37286400 | 1.31198500  | 0.00000000 |
| C | -2.11142600 | 2.64690600  | 0.00000000 |
| C | -0.77915300 | 3.12346300  | 0.00000000 |
| C | 0.25461000  | 2.22044700  | 0.00000000 |
| C | 0.00000000  | 0.84518800  | 0.00000000 |
| H | -3.36962100 | 0.89478200  | 0.00000000 |
| H | -2.94415800 | 3.33734200  | 0.00000000 |
| H | -0.58348700 | 4.18704700  | 0.00000000 |
| H | 1.28517500  | 2.55226800  | 0.00000000 |
| H | -2.34305000 | -1.47271700 | 0.00000000 |

|   |             |             |            |
|---|-------------|-------------|------------|
| C | -1.39725900 | -0.95846900 | 0.00000000 |
| N | -1.34015900 | 0.40498300  | 0.00000000 |

#### 16. Pseudocarbazole

|   |             |             |             |
|---|-------------|-------------|-------------|
| C | 2.90068300  | -1.20991700 | 0.00009400  |
| C | 3.39016400  | 0.13114000  | 0.00002500  |
| C | 2.52330900  | 1.18003200  | -0.00003800 |
| C | 1.12205000  | 0.95468400  | -0.00004400 |
| C | 1.56578200  | -1.44023100 | 0.00007600  |
| H | 1.13253100  | -2.42988500 | 0.00012100  |
| C | -1.13604900 | 0.95025200  | 0.00000100  |
| C | -2.51898000 | 1.20563000  | 0.00001100  |
| C | -3.39928100 | 0.14463300  | -0.00000100 |
| C | -2.94254000 | -1.18707200 | -0.00002800 |
| C | -1.59089500 | -1.47452000 | -0.00004500 |
| C | -0.70155500 | -0.40183500 | -0.00001800 |
| H | -2.88497500 | 2.22561800  | 0.00002100  |
| H | -4.46613300 | 0.33421100  | 0.00000800  |
| H | -3.66103100 | -1.99725200 | -0.00003800 |
| H | -1.24540400 | -2.50109000 | -0.00006500 |
| C | 0.01647400  | 1.77943200  | -0.00002200 |
| N | 0.68405600  | -0.39191900 | -0.00002600 |
| H | 0.04315200  | 2.85692200  | -0.00005400 |
| H | 3.58279100  | -2.04818200 | 0.00016700  |
| H | 2.87735100  | 2.20284700  | -0.00007400 |
| H | 4.45835300  | 0.30687800  | 0.00003000  |
